# Supplementary material for: Mercury wet deposition in the eastern United States: characteristics and scavenging ratios
Source: Royal Society of Chemistry journal article supplement (doi:10.1039/c3em00454f), 2013-01-01
Supplement: c3em00454f.pdf [file c3em00454f.pdf]

Supplemental Information for

**Mercury Wet Deposition in the Eastern United States: Characteristics  
and Scavenging Ratios**

Jiaoyan Huang<sup>1</sup>, Feng-Chih Chang<sup>2</sup>, Shaolei Wang<sup>2</sup>, Young-Ji Han<sup>3</sup>, Mark Castro<sup>4</sup>, Eric  
Miller<sup>5</sup>, Thomas M. Holsen<sup>2\*</sup>

<sup>1</sup> Department of Natural Resources and Environmental Sciences, University of Nevada,  
Reno, NV 89557, USA

<sup>2</sup> Department of Civil and Environmental Engineering, Clarkson University, Potsdam,  
NY 13699, USA

<sup>3</sup> Department of Environmental Science, College of Natural Science, Kangwon National  
University, 192-1 Hyoja-2-dong, Chuncheon, Kangwon-do, 200-701, Republic of Korea

<sup>4</sup> Appalachian Laboratory, University of Maryland Center for Environmental Science,  
301 Braddock Road, Frostburg, MD 21532, USA

<sup>5</sup> Ecosystems Research Group, Ltd., Aldrich House, 16 Beaver Meadow Road, Norwich,  
VT 05055, USA

\* Corresponding author: Thomas M. Holsen

Email: [tholsen@clarkson.edu](mailto:tholsen@clarkson.edu); Phone: 1-315-268-3851; Fax: 1- 315-268-7985.

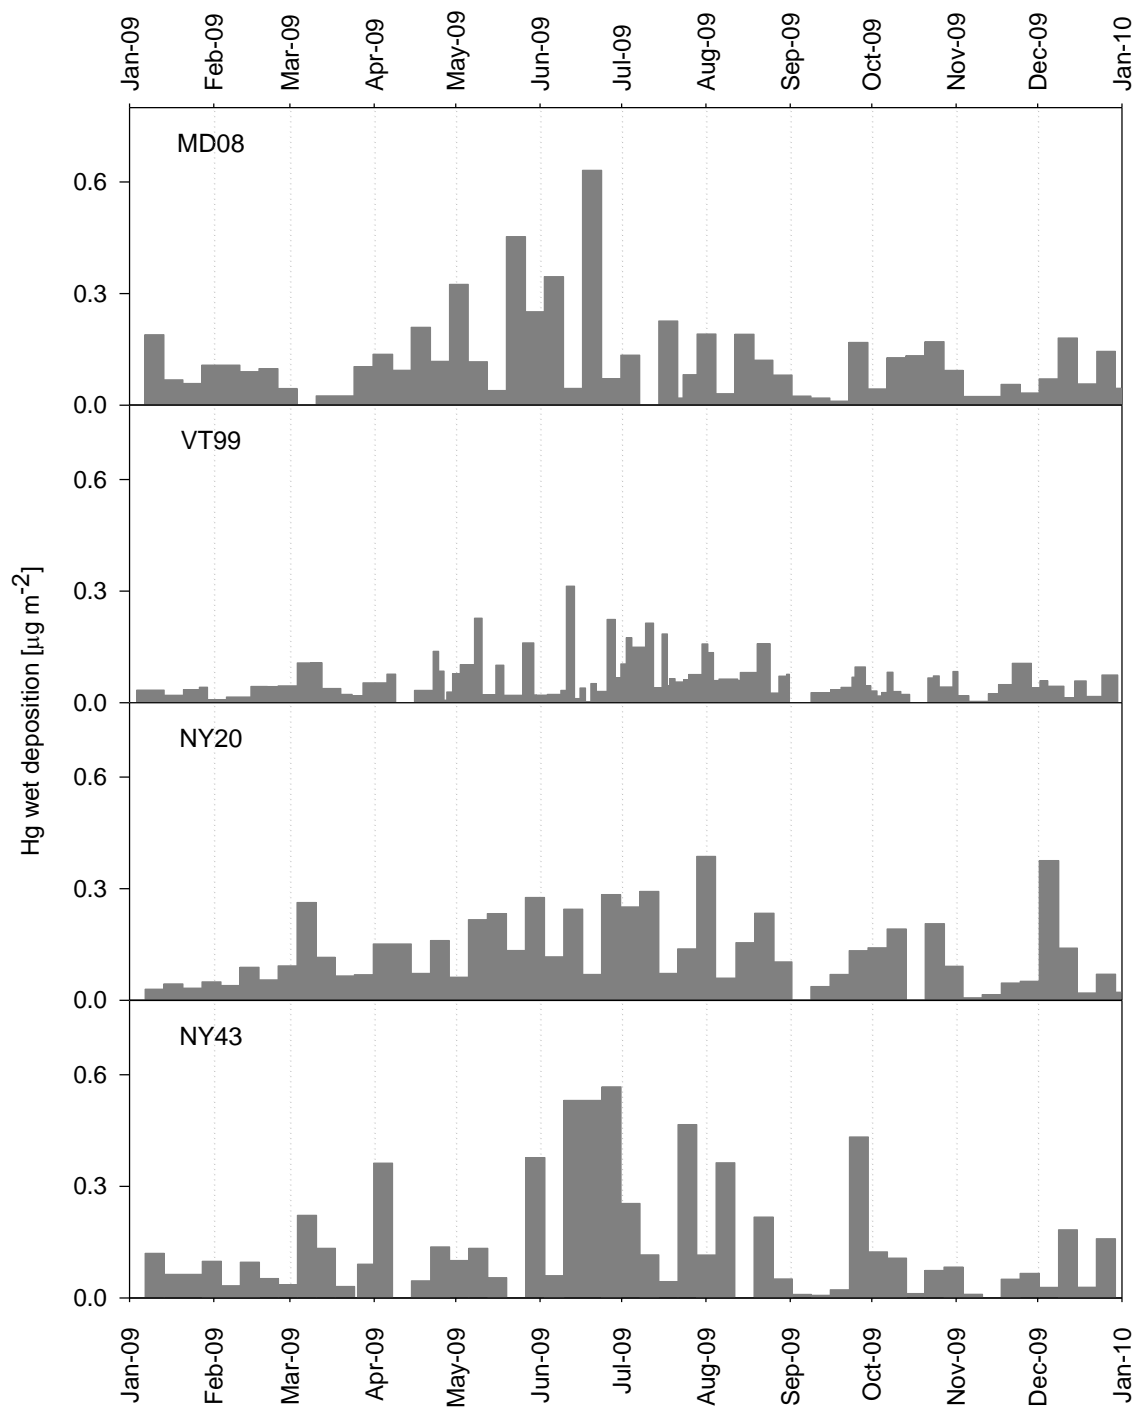

Figure SI 1 – Time series of individual Hg wet deposition samples at MD08, VT99, NY20, and NY43.

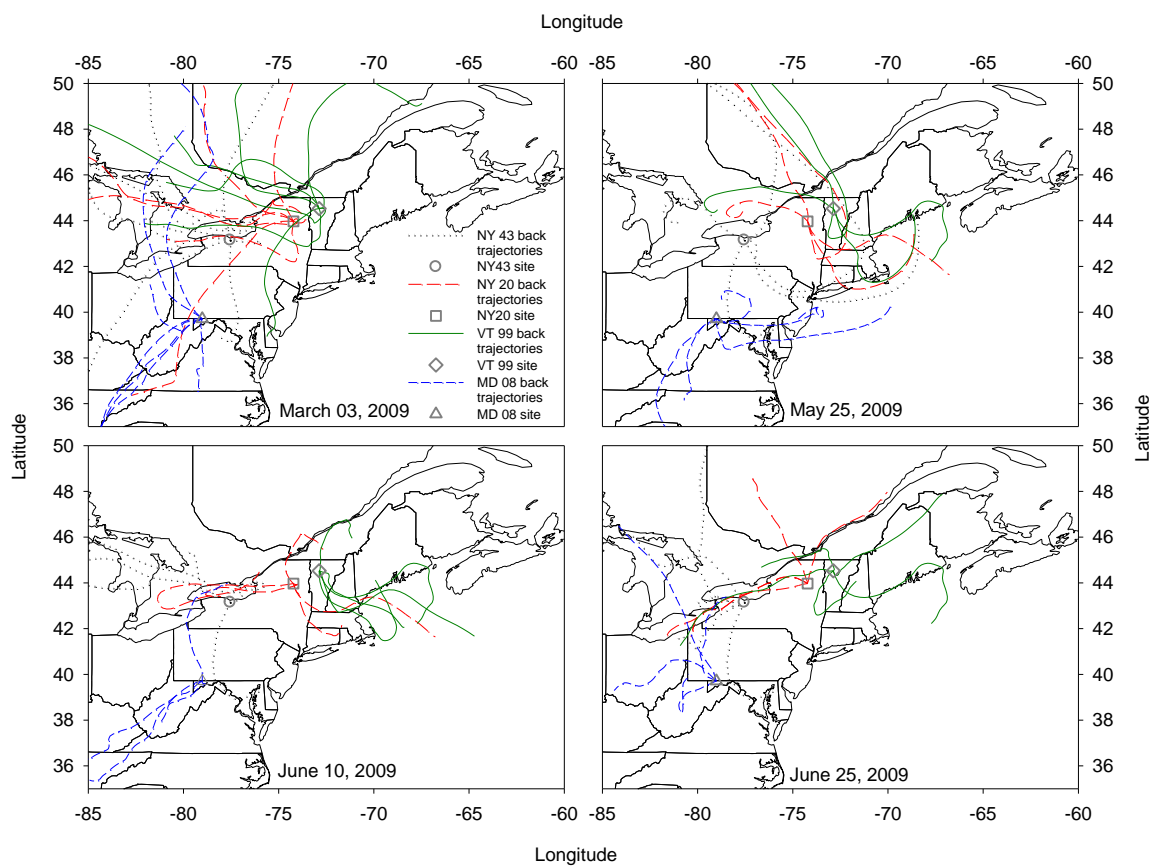

Figure SI 2 – Back trajectories of selected high Hg wet deposition events at MD08, VT99, NY20, and NY43.
